# Supplementary material for: Dual-tasking effects on static and dynamic postural balance performance: a comparison between endurance and team sport athletes
Source: PeerJ. 2020 Sep 16;8:e9765. doi: 10.7717/peerj.9765 (PMC7501801; doi:10.7717/peerj.9765)
Supplement: Supplemental Information 1 — The different behavior in postural balance control between endurance athletes (END) and team players (TP) both in single (ST) and dual task (DT). [file peerj-08-9765-s001.xlsx]

## Sheet: ENDURANCE
	STATIC ST		STATIC DT		DYNAMIC ST			DYNAMIC DT			COGNITIVE SCORE
ID	Area elipse ST	sway path ST	Area elipse DT	sway path DT	FB ST	GB ST	FiB ST	FB DT	GB DT	FiB DT	STAT	DYNAMIC
E_001	2.1635	2.5105	0.705	2.5015	256.997	26.175	15.1	204.777	30.9208	19.5917	19.5	16.5
E_002	1.419	3.2865	1.528	3.6005	271.731	24.4958	12.9875	254.243	26.375	14.8625	22	19.5
E_003	1.748	3.0715	1.852	3.096	211.172	30.6917	18.05	184.972	33.7292	20.1708	12.5	9
E_004	1.642	2.8295	2.1695	3.338	255.934	26.025	14.625	154.689	32.1	22.1	18	16
E_005	1.6045	2.949	1.622	3.192	239.8	28.5208	14.875	213.94	30.7583	18.4333	6.5	7
E_006	1.588	3.036	1.314	2.907	219.21	29.9833	17.275	229.792	28.5958	16.625	21.5	22.5
E_007	1.179	2.843	0.737	2.8125	272.557	27.1458	10.8417	284.109	24.9292	11.1042	16	12
E_008	1.415	2.7535	0.9055	2.6895	290.225	23.8583	11.7583	265.177	25.2125	14.2792	17.5	13
E_009	1.542	2.765	1.9175	2.931	302.659	21.7542	11.9958	264.768	26.0167	14.575	18.5	15.5
E_010	0.72	2.9335	1.0905	3.1325	323.749	19.3542	10.3708	214.447	29.4083	19.575	7	6.5
E_011	1.4145	3.25	0.911	3.423	223.155	30.2833	17.3292	262.736	26.75	13.375	16	15.5
E_012	0.779	3.1665	0.7055	3.301	247.881	27.1833	14.0792	252.831	26.675	14.8792	10.5	6.5
E_013	1.2305	2.987	1.127	3.0675	297.635	22.2667	11.9833	316.379	20.3583	11.4333	9.5	7.5
E_014	2.804	3.4985	4.257	4.334	269.124	26.2417	12.9625	245.483	28.2125	13.8875	26	22.5
E_015	0.4075	3.145	2.2145	3.4615	254.589	27.4417	12.7083	318.725	20.9167	7.89583	13.5	13.5
E_016	0.9625	3.183	1.3165	3.296	337.245	19.2875	9.775	268.324	24.9208	14.6167	14.5	11.5
E_017	1.8155	2.6465	1.746	3.488	265.802	25.2458	13.675	189.13	33.5625	18.8417	21	18
E_018	3.179	3.018	1.8455	2.9315	243.837	22.84	11.8	262.212	22.045	9.64	14	17.5
E_019	0.7815	3.042	0.411	3.2035	152.606	33.95	18.575	116.322	37.87	24.96	15.5	13

## Sheet: TP
	STATIC ST		STATIC DT		DYNAMIC ST			DYNAMIC DT			COGNITIVE SCORE
ID	Area elipse ST	sway path ST	Area elipse DT	sway path DT	FB ST	GB ST	FiB ST	FB DT	GB DT	FiB DT	STAT	DYNAMIC
TP_001	2.501	3.0035	2.3765	2.91	184.428	33.3125	21.2792	174.835	33.7292	22.0167	16	15
TP_002	1.299	2.418	4.096	2.899	207.672	30.8625	19.5667	160.472	35.2083	23.25	10	9
TP_003	0.997	2.596	1.3855	2.6975	197.937	33.0708	18.525	240.61	27.85	13.7375	7.5	11.5
TP_004	3.58	2.458	6.5385	3.0465	243.452	27.6167	17.2833	260.229	25.8458	15.1333	31	26.5
TP_005	0.933	2.5875	1.004	2.5915	297.922	22.3917	11.625	256.747	26.7375	14.3542	18.5	14
TP_006	2.7005	2.8465	2.678	2.866	296.488	21.9042	12.1292	326.713	19.6917	8.775	18	19.5
TP_007	0.6	2.7915	1.2555	3.146	270.94	25.8708	9.95833	277.938	23.625	11.0208	16	13.5
TP_008	1.874	3.072	2.483	3.3491	289.925	23.7917	12.8792	303.13	22.1208	12.1583	13	9
TP_009	0.561	2.8615	0.3635	2.971	232.196	28.6667	16.75	242.688	27.5167	17.2083	15.5	14
TP_010	0.753	2.932	0.4635	3.126	181.913	33.2	21.8417	181.368	33.4125	21.0833	12	11
TP_011	2.316	2.606	5.4225	3.759	236.224	29.2708	14.775	216.11	29.3792	17.6792	13.5	10.5
TP_012	1.213	2.914	1.286	3.095	216.11	29.3792	17.6792	236.224	29.2708	14.775	36.5	31.5
TP_013	1.6765	2.209	0.8515	2.1915	267.055	25.5375	13.325	228.979	29.1542	16.1375	12.5	14
TP_014	2.722	2.54	10.3075	3.301	253.932	26.5958	15.0417	257.828	26.7042	14.4625	7	6.5
TP_015	2.0075	2.5985	1.876	2.8545	295.199	22.2208	12.1667	307.306	21.6167	12.2458	14.5	13
TP_016	1.1465	2.5585	3.855	4.275	282.719	23.7583	13.375	281.464	24.35	12.5583	23.5	20.5
